# Supplementary material
Source: PubMed Central journal article supplement (PMC6156655)
Supplement: pnas.1804002115.sapp.pdf [file pnas.1804002115.sapp.pdf]

1

## 2 **Supplementary Information for**

### 3 **Perspective-taking can promote short-term inclusionary behavior toward Syrian refugees**

4 **Claire L. Adida, Adeline Lo and Melina R. Platas**

5 **Claire L. Adida.**

6 **E-mail: [cadida@ucsd.edu](mailto:cadida@ucsd.edu)**

#### 7 **This PDF file includes:**

8     Supplementary text

9     Figs. S1 to S16

10    Tables S1 to S2

11    References for SI reference citations

## 12 Supporting Information Text

### 13 1. Materials and methods

14 **Sample.** We worked with YouGov, which provides a representative sample of American citizens. The following describes  
15 YouGov's sampling strategy:

16 "YouGov interviewed 7806 respondents randomly assigned to six different treatment groups who were then matched down  
17 to a sample of 900 each to produce the final dataset of 5400 respondents. The respondents were matched to a sampling frame  
18 of US citizens on gender, age, race, education, party identification, ideology, and political interest. The frame was constructed  
19 by stratified sampling from the full 2010 American Community Survey (ACS) sample with selection within strata by weighted  
20 sampling with replacements (using the person weights on the public use file). Data on voter registration status and turnout  
21 were matched to this frame using the November 2010 Current Population Survey. Data on interest in politics and party  
22 identification were then matched to this frame from the 2007 Pew Religious Life Survey. The matched cases were weighted to  
23 the sampling frame using propensity scores. The matched cases and the frame were combined and a logistic regression was  
24 estimated for inclusion in the frame. The propensity score function included age, gender, race/ethnicity, years of education,  
25 voter registration, ideology, non-identification with a major party, and census region. The propensity scores were grouped into  
26 deciles of the estimated propensity score in the frame and post-stratified according to these deciles. All six groups were then  
27 combined, and the combined weights were post-stratified to match a full stratification of four category age, four category race,  
28 gender, and four category education." (3)

29 The sample was randomly divided into two waves, and within each wave, each respondent was randomly assigned to the  
30 control, perspective-taking, or information condition. The retention rate for Wave 2 was 86.8%. While respondents may or  
31 may not complete the survey on the day they receive the invitation, we ensured that our study was completed before the  
32 presidential election on November 8, 2016.

33 **Instrument.** Our survey instrument was divided into three sections: (1) the collection of pretreatment covariates, (2) the  
34 administration of the treatment, (3) the collection of outcome data. Our control condition offered no treatment, such that it  
35 consisted of only two sections: the collection of pretreatment covariates, and the collection of outcome data.

36 Our perspective-taking treatment draws from the Pulitzer Center's lesson-building exercise entitled "What is it like to be a  
37 refugee and how can we help spread the word about the problems refugees face?", available online at <https://pulitzercenter.org/builder/lesson/w/it-be-refugee-and-how-can-we-help-spread-word-about-problems-refugees-face-16023>.

38 Our information treatment is presented in the form of a figure (1) that illustrates the stark contrast between the contribution  
39 of countries such as Canada, France, and Germany, and that of the United States. We note that this treatment provides only a  
40 set of facts about countries' commitments to accept refugees: there is no text which interprets this information or puts forward  
41 an argument in favor of increasing refugee commitments.  
42

43 **Pre-analysis Plan.** In our pre-analysis plan, we specified two main outcomes of interest. *Rating* is our main attitudinal measure,  
44 and *Letter* is our main behavioral measure.  
45

46 **Rating** *On a scale from 1 to 7, where 1 indicates the United States should absolutely not admit the refugee and 7 indicates*  
47 *that the United States should definitely admit the refugee, how would you rate Refugee 1/2?*  
48

49 **Letter** *Did the respondent contribute comments to an anonymous letter to be sent to the next President of the United States*  
50 *in support of resettling refugees?*  
51

52 In this paper, we present results on our behavioral measure. In the SI, we show results on the attitudinal measure we  
53 pre-registered, as well as on one additional outcome measure: a measure of support for refugee admissions provided they pass a  
54 security screening.

55 **Analysis.** Given the randomized design of the experiment, we can rely primarily on linear regressions of treatments with  
56 appropriate covariate controls on the outcomes to identify our causal estimands of interest.

57 We include controls for the following pre-specified pretreatment covariates, measured for each respondent: gender, age  
58 (via birth year), U.S. born, education level, religion, party ID, and ethnocentrism. We use the demeaning construction for  
59 non-categorical covariate controls as well as interactions with the treatment in estimating equations (2). Given the goal of  
60 identifying the treatment effect of treatment  $T$  on outcome  $Y$  and controlling for pretreatment covariate  $X$ , the estimating  
61 equation is:

$$62 \quad Y = \beta_0 + \beta_1 T + \beta_2 (X - \bar{X}) + \beta_3 T \cdot (X - \bar{X}) \quad [1]$$

63 where  $\beta_1$  is the estimated treatment effect, and errors are robust and clustered at the individual level for outcomes measured  
64 several times for each individual (*Rating*). While our randomized research design allows for an unbiased estimation of the  
65 treatment effect, we wish to improve precision, both through the adjustment of covariates (2) as well as the appropriate  
66 clustering of errors. We note that our main findings are unchanged when using WLS.

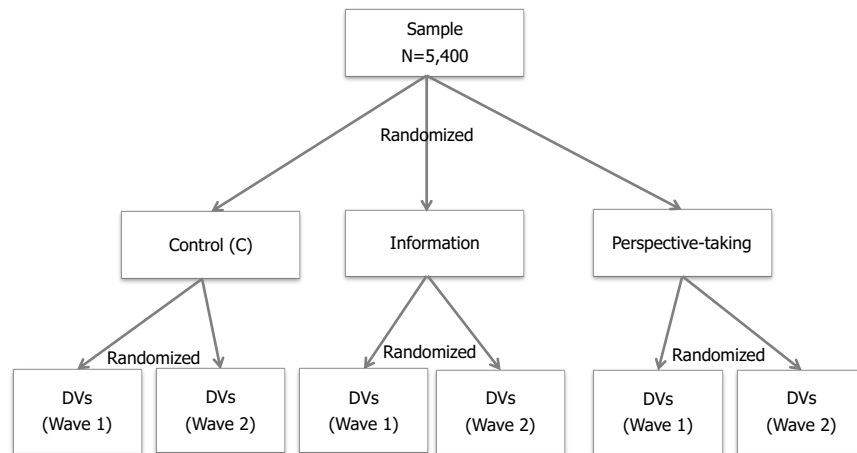

Fig. S1. Research design

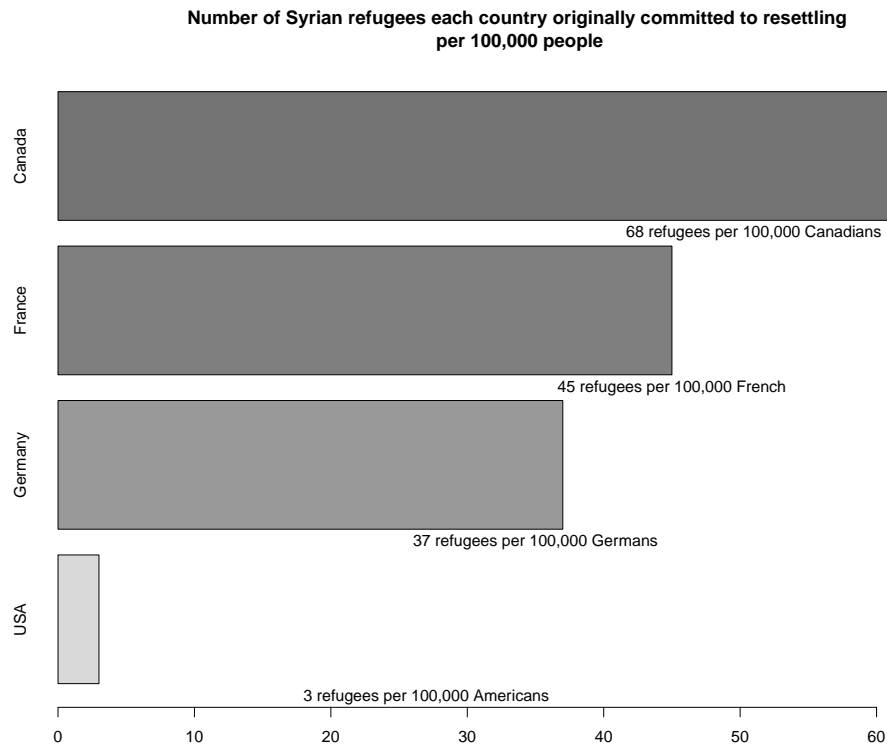

Fig. S2. Information treatment

68 **3. Results by wave**

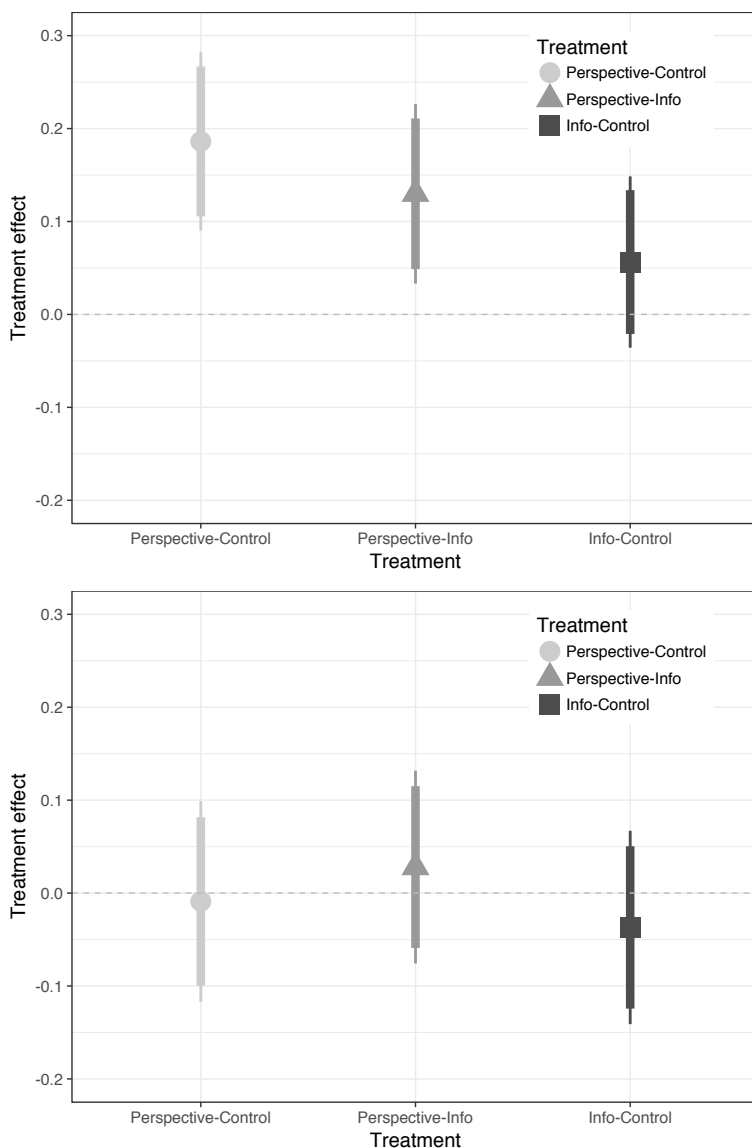

**Fig. S3. Top:** Average treatment effect of perspective-taking relative to the control condition (left-most) and the information condition (middle); Average treatment effect of information relative to control condition (right-most). Bars represent 90% and 95% confidence intervals. Wave 1 sample. **Bottom:** Average treatment effect of perspective-taking relative to the control condition (left-most) and the information condition (middle); Average treatment effect of information relative to control condition (right-most). Bars represent 90% and 95% confidence intervals. Wave 2 sample. All graphs show average treatment effects based on a OLS regression estimating Equation 1.

69 **4. Weighted Least Squares**

70 When we estimate our average treatment effects using sample weights to adjust for the sampling process described above, our  
 71 results hold:

72

**Table S1. Weighted Least Squares Analysis**

| Variable     | Treatment: Information |                    | Treatment: Perspective-taking |                                |
|--------------|------------------------|--------------------|-------------------------------|--------------------------------|
|              | (1)                    | (2)                | (3)                           | (4)                            |
|              | DV: <i>Rating</i>      | DV: <i>Letter</i>  | DV: <i>Rating</i>             | DV: <i>Letter</i>              |
| Intercept    | 4.622***<br>(0.08)     | 0.165***<br>(0.01) | 4.622***<br>(0.08)            | 0.165***<br>(0.02)             |
| Treatment    | -0.088<br>(0.11)       | -0.027<br>(0.02)   | -0.006<br>(0.11)              | 0.040 <sup>(.)</sup><br>(0.02) |
| Observations | 10,800                 | 1,800              | 10,800                        | 1,800                          |

*Notes:* Coefficients are from a simple regression of outcome on treatment with errors robust, and clustered for models (1) and (3), weighted by sample inclusion probability. Sample is from Wave 1 only, as pre-registered.  
 \*\*\*  $p \geq 0.001$ ; \*\*  $p \geq 0.01$ ; \*  $p \geq 0.05$ ; (.)  $p \geq 0.10$ .

73 **5. Wave effect on writing a letter**

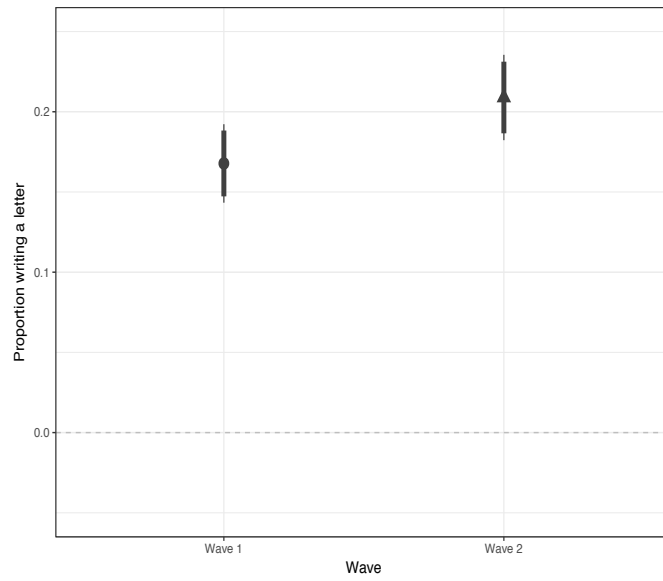

**Fig. S4. DV: Letter.** Proportion of sample in control condition that wrote a positive letter for Wave 1 (left) and Wave 2 (right). Bars are 95% and 90% confidence intervals from difference-of-means tests.

74 **6. Example letters**

75

**Table S2. Examples of anonymous letters to President 45**

| Supportive messages                                                                                                                                                                                                                                                                                                                                                                                                                                             | Unsupportive messages                                                                                                                                                                                                                                                                                                                                                                                                                                                                                                                                                                                                                                                |
|-----------------------------------------------------------------------------------------------------------------------------------------------------------------------------------------------------------------------------------------------------------------------------------------------------------------------------------------------------------------------------------------------------------------------------------------------------------------|----------------------------------------------------------------------------------------------------------------------------------------------------------------------------------------------------------------------------------------------------------------------------------------------------------------------------------------------------------------------------------------------------------------------------------------------------------------------------------------------------------------------------------------------------------------------------------------------------------------------------------------------------------------------|
| <p>"Give me your tired, your poor, Your huddled masses yearning to breathe free, The wretched refuse of your teeming shore. Send these, the homeless, tempest-tost to me, I lift my lamp beside the golden door!"</p>                                                                                                                                                                                                                                           | <p>"I absolutely do not support accepting refugees into the US. We have people here who are suffering. Help Americans before you help everyone else."</p>                                                                                                                                                                                                                                                                                                                                                                                                                                                                                                            |
| <p>"After being very well vetted, I see no reason why the United States should not admit a Syrian refugee to our country. This is a humanitarian crisis and the United States should do its part in helping to alleviate the displacement and immense suffering the Syrian people. The people we admit will ultimately contribute to our society and can be an asset. Please make a careful, thoughtful consideration of this important matter. Thank you."</p> | <p>"Don't do it. We are over crowded and can't even take care of our own. We have homeless veterans on our street's and can't help them. How do we have money to help immigrant's who will potentially blow us up in the end? It's a waste of our resources! Even pssing a background check you can't measure their true intention! I would much rather see the US help US citizens instead of refugees. I'm scared to leave my home. There are refugees every where and they are rude and treat me like i'm invading their space!Their invading mine! I held the door open for one at a department store and was called a female dog! Please save our country!"</p> |
| <p>"Dear POTUS, I express my support of refugees coming to the United States. Especially the women and children, they need food and health-care. Thanks so much."</p>                                                                                                                                                                                                                                                                                           | <p>"Sorry have no support for them. They should be banned as all Muslims should."</p>                                                                                                                                                                                                                                                                                                                                                                                                                                                                                                                                                                                |

76 **7. Other HTEs**

|                       | <b>Model 1: Perspective-taking vs Control</b> | <b>Model 2: Information vs Control</b> | <b>Model 3: Perspective-taking vs Information</b> |
|-----------------------|-----------------------------------------------|----------------------------------------|---------------------------------------------------|
| <b>Treatment</b>      | 0.045* (0.02)                                 | -0.002 (0.2)                           | 0.048** (0.02)                                    |
| Education: College    | 0.106*** (0.02)                               | 0.106*** (0.02)                        | 0.118*** (0.02)                                   |
| Education: Postgrad   | 0.281*** (0.06)                               | 0.282*** (0.06)                        | 0.227*** (0.06)                                   |
| Treatment*College     | -0.001 (0.04)                                 | 0.012 (0.03)                           | -0.013 (0.04)                                     |
| Treatment*Postgrad    | -0.108 (0.79)                                 | -0.055 (0.08)                          | -0.053 (0.08)                                     |
| Party: Independent    | -0.021 (0.03)                                 | -0.021 (0.03)                          | -0.098** (0.03)                                   |
| Party: Republican     | -0.185*** (0.03)                              | -0.185*** (0.03)                       | -0.197*** (0.03)                                  |
| Treatment*Independent | -0.118* (0.05)                                | -0.076(.) (0.05)                       | -0.042 (0.05)                                     |
| Treatment*Republican  | -0.082(.) (0.043)                             | -0.012 (0.04)                          | -0.070 (0.04)                                     |
| Race: White           | 0.022 (0.03)                                  | 0.022 (0.03)                           | 0.016 (0.03)                                      |
| Treatment*White       | -0.011 (0.4)                                  | -0.006 (0.04)                          | -0.005 (0.04)                                     |
| Sex: Male             | 0.011 (0.013)                                 | 0.011 (0.02)                           | -0.0001 (0.01)                                    |
| Treatment*Male        | -0.021 (0.019)                                | -0.011 (0.02)                          | -0.010 (0.02)                                     |
| Wave: Wave 2          | 0.041* (0.02)                                 | 0.041* (0.02)                          | 0.043* (0.02)                                     |
| Treatment*Wave 2      | -0.052* (0.03)                                | 0.002 (0.03)                           | -0.054* (0.03)                                    |

77 **Notes:** Our treatment coefficient is obtained from a simple model of our outcome variable, *Letter*, on treatment on wave 1 sample with robust standard errors in parentheses. For covariates, the model regresses our outcome variable, *Letter* on the treatment, the covariate in question, and the interaction of the two on wave 1 sample (except for the model estimating wave effects) with robust standard errors in parentheses. The baseline category for Education is High school. The baseline category for Party is Democrat. The baseline category for Sex is Female. The baseline category for Race is Non-White. The baseline category for Wave is Wave 1. (.) indicates statistical significance at 90%, \* indicates statistical significance at 95%, \*\* indicates statistical significance at 99%, and \*\*\* indicates significance greater than 99% confidence level.



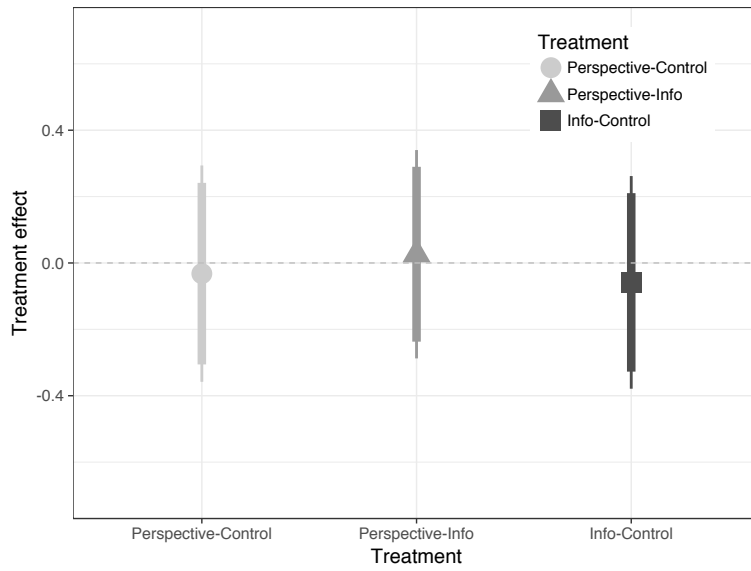

**Fig. S5. DV: Refugee rating.** Average treatment effect of perspective-taking relative to the control condition (left-most) and the information condition (middle); Average treatment effect of information relative to control condition (right-most). Bars represent 90% and 95% confidence intervals. Full sample. Average treatment effects based on an OLS estimating Equation 1.

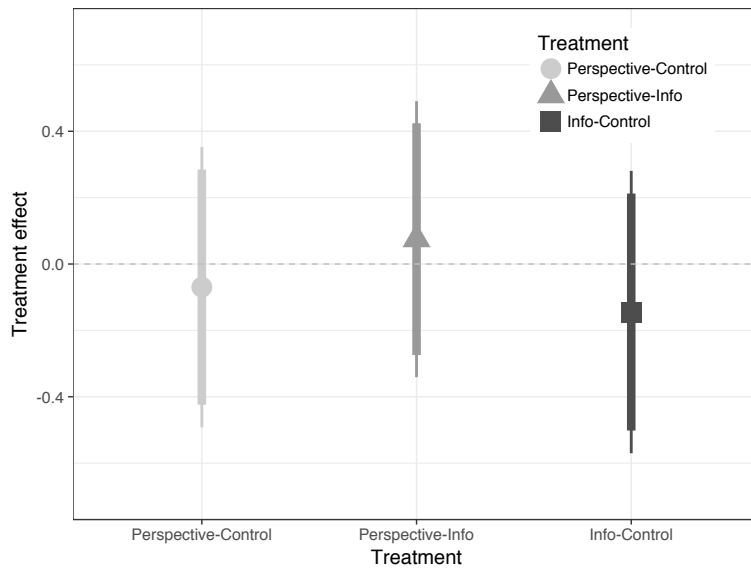

**Fig. S6. DV: Refugee rating, Wave 1.** Average treatment effect of perspective-taking relative to the control condition (left-most) and the information condition (middle); Average treatment effect of information relative to control condition (right-most). Bars represent 90% and 95% confidence intervals. Wave 1 sample. Average treatment effects based on an OLS estimating Equation 1.

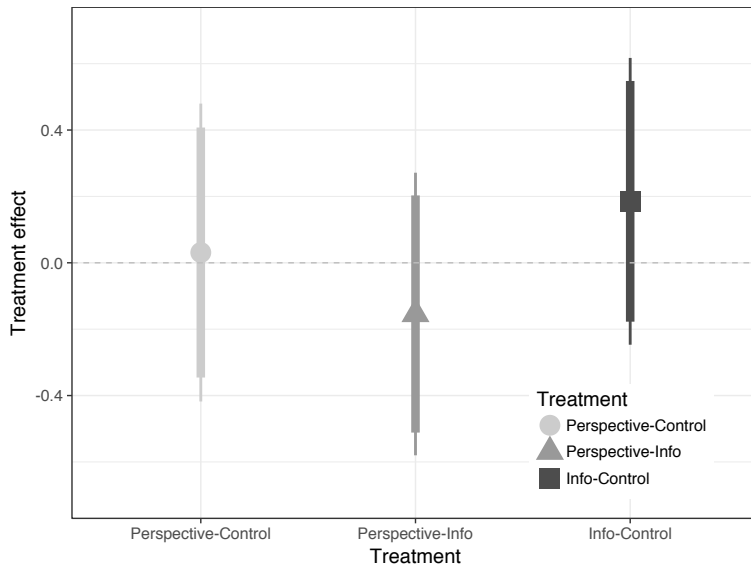

**Fig. S7. DV: Refugee rating, Wave 2.** Average treatment effect of perspective-taking relative to the control condition (left-most) and the information condition (middle); Average treatment effect of information relative to control condition (right-most). Bars represent 90% and 95% confidence intervals. Wave 2 sample. Average treatment effects based on an OLS estimating Equation 1.

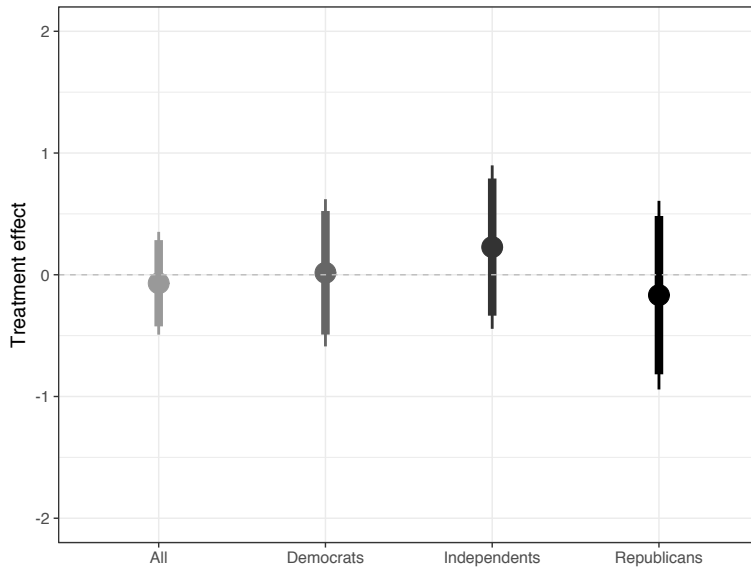

**Fig. S8. DV: Refugee rating.** From left to right: Average treatment effect of perspective-taking treatment on refugee rating for full sample, sub-sample of Democrats, sub-sample of Independents, and sub-sample of Republicans. Bars represent 90% and 95% confidence intervals. Wave 1 sample. All graphs show treatment effects based on a OLS regression estimating Equation 1.

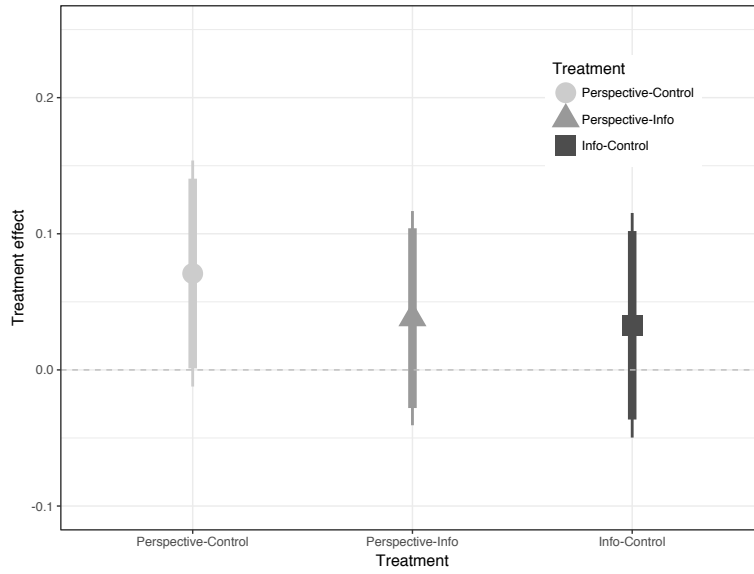

**Fig. S9. DV: Refugee screening.** Average treatment effect of perspective-taking relative to the control condition (left-most) and the information condition (middle); Average treatment effect of information relative to control condition (right-most). Bars represent 90% and 95% confidence intervals. Full sample. Average treatment effects based on a OLS regression estimating Equation 1.

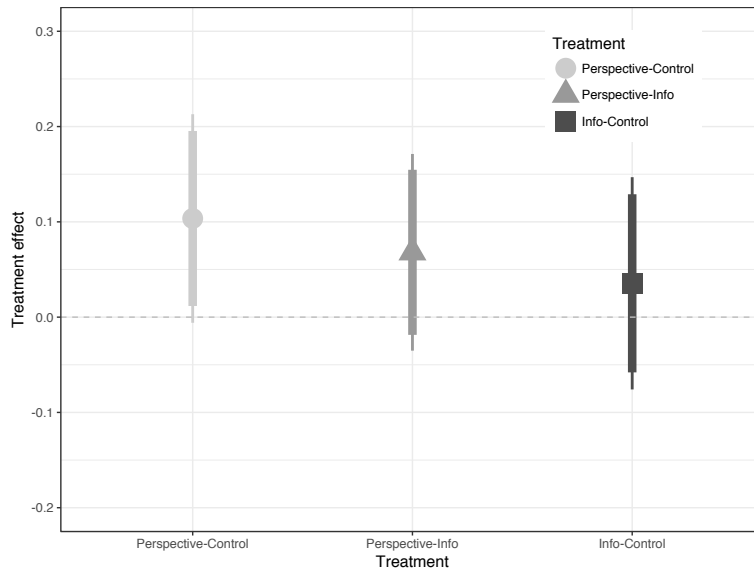

**Fig. S10. DV: Refugee screening, Wave 1.** Average treatment effect of perspective-taking relative to the control condition (left-most) and the information condition (middle); Average treatment effect of information relative to control condition (right-most). Bars represent 90% and 95% confidence intervals. Wave 1 sample. Average treatment effects based on a OLS regression estimating Equation 1.

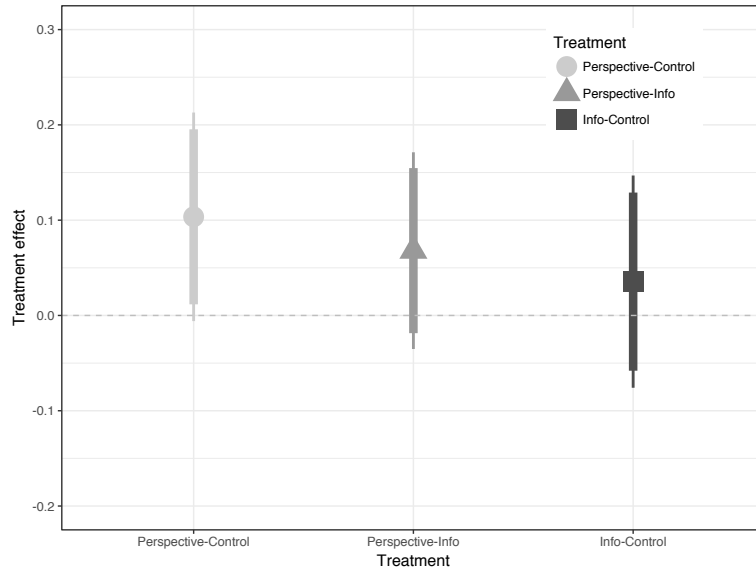

**Fig. S11. DV: Refugee screening, Wave 2.** Average treatment effect of perspective-taking relative to the control condition (left-most) and the information condition (middle); Average treatment effect of information relative to control condition (right-most). Bars represent 90% and 95% confidence intervals. Wave 2 sample. Average treatment effects based on a OLS regression estimating Equation 1.

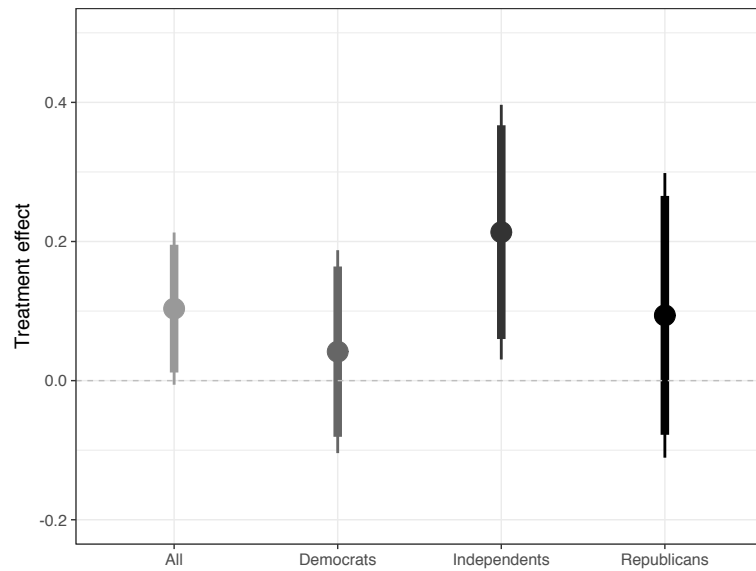

**Fig. S12. DV: Refugee screening.** From left to right: Average treatment effect of perspective-taking treatment on refugee screening for full sample, sub-sample of Democrats, sub-sample of Independents, and sub-sample of Republicans. Bars represent 90% and 95% confidence intervals. Wave 1 sample. All graphs show treatment effects based on a OLS regression estimating Equation 1.

79 **9. Exploring the link between the attitudinal measure (Y2) and the semi-behavioral measure (Y6)**

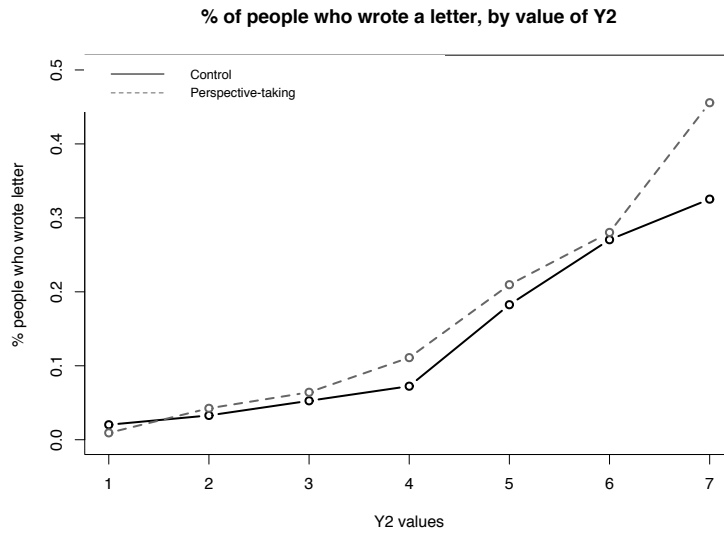

**Fig. S13. Full wave 1 sample.** Probability of writing a letter at each refugee rating value in the control (solid line) and perspective-taking (dashed line) conditions. Wave 1 sample.

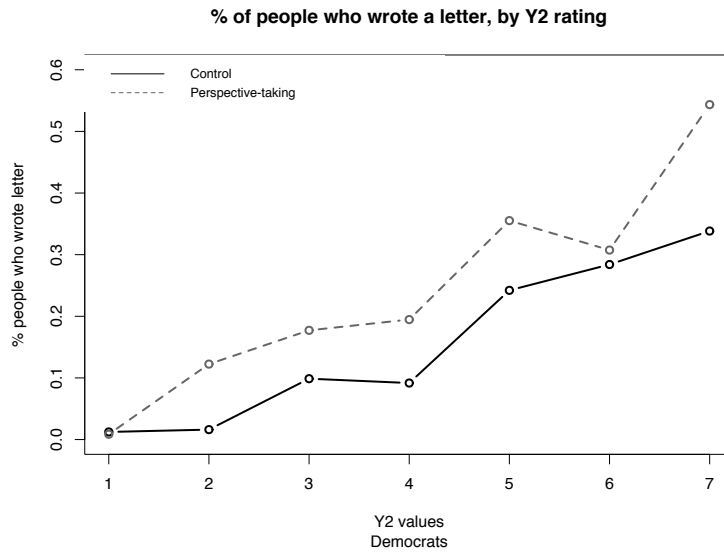

**Fig. S14. Democrats wave 1 sample.** Probability of writing a letter at each refugee rating value for Democrats in the control (solid line) and perspective-taking (dashed line) conditions. Wave 1 sample.

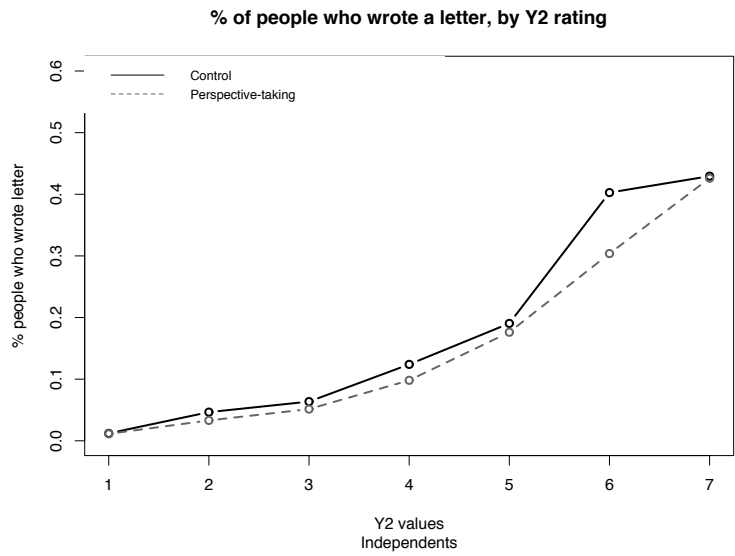

**Fig. S15. Independents wave 1 sample.** Probability of writing a letter at each refugee rating value for Independents in the control (solid line) and perspective-taking (dashed line) conditions. Wave 1 sample.

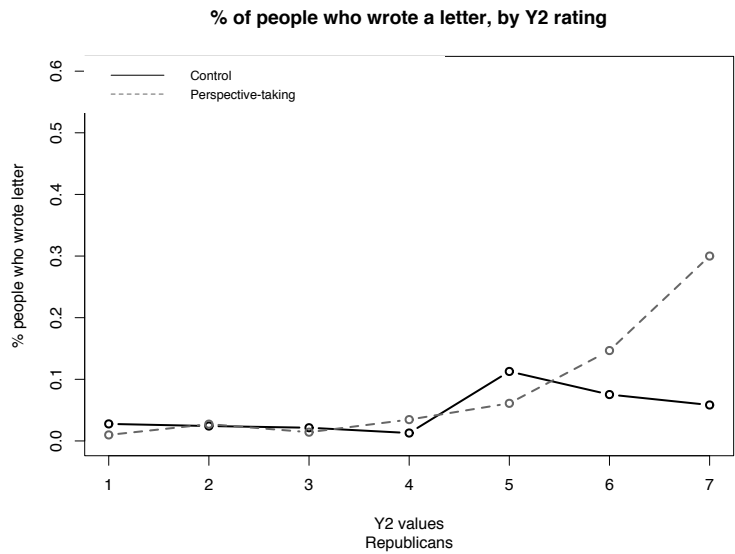

**Fig. S16. Republicans wave 1 sample.** Probability of writing a letter at each refugee rating value for Republicans in the control (solid line) and perspective-taking (dashed line) conditions. Wave 1 sample.

80 **References**

- 81 1. Ostrand N (2015) The syrian refugee crisis: a comparison of responses by germany, sweden, the united kingdom, and the  
 82 united states. *Journal on Migration and Human Security* 3(3):255–279.  
 83 2. Lin W (2013) Agnostic notes on regression adjustments to experimental data: Reexamining freedman’s critique. *The*  
 84 *Annals of Applied Statistics* 7(1):295–318.  
 85 3. YouGov (2016) Yougov sampling frame and codebook.
